# Supplementary material for: N/Si co-doped oriented single crystalline rutile TiO2 nanorods for photoelectrochemical water splitting
Source: Royal Society of Chemistry journal article supplement (doi:10.1039/c5ta00613a), 2015-01-01
Supplement: c5ta00613a1.pdf [file c5ta00613a1.pdf]

1 **Supplementary Information**  
2 **For Journal of Materials Chemistry A**

3  
4

5 **N/Si co-doped Oriented Single Crystalline Rutile TiO<sub>2</sub> Nanorods for**  
6 **Photoelectrochemical Water Splitting**

7 Xiaofan Zhang, Bingyan Zhang, Zhixiang Zuo, Mingkui Wang, Yan Shen\*

8 Wuhan National Laboratory for Optoelectronics, Huazhong University of Science and Technology, Luoyu Road

9 1037, Wuhan, 430074, P. R. China.

10 E-mail: [ciac\\_sheny@mail.hust.edu.cn](mailto:ciac_sheny@mail.hust.edu.cn)

11

12 **Experimental Section:**

13 **Fabrication of perovskite solar cell (PSC).** The FTO glass was first etched to form  
14 two separated electrodes before being cleaned ultrasonically with ethanol. Then, the  
15 patterned substrates were coated by a compact TiO<sub>2</sub> layer by aerosol spray pyrolysis,  
16 and a 20 nm nanoporous TiO<sub>2</sub> layer was deposited by screen-printing. After being  
17 sintered at 500 °C for 30 min, the perovskite absorber layer was deposited using the  
18 two-step sequential deposition method<sup>2</sup>. The mesoporous TiO<sub>2</sub> films were infiltrated  
19 with PbI<sub>2</sub> by spin-coating a PbI<sub>2</sub> solution in DMF (500 mg mL<sup>-1</sup>) that was kept at 70  
20 °C. After drying, the films were dipped in a solution of CH<sub>3</sub>NH<sub>3</sub>I in 2-propanol (10  
21 mg mL<sup>-1</sup>) for 20 s and rinsed with 2-propanol. A 1 μm ZrO<sub>2</sub> space layer was printed on  
22 the top of the nanoporous TiO<sub>2</sub> layer using ZrO<sub>2</sub> slurry, which acts as an insulating  
23 layer to prevent electrons from reaching the back contact. Then it was sintered at 500  
24 °C for 30 min. Finally, a carbon black/graphite counter electrode with the thickness of  
25 about 8 μm was coated on the top of ZrO<sub>2</sub> layer by printing carbon black/graphite  
26 composite slurry (1:3) and sintering at 400 °C for 30 min. After cooling down to room  
27 temperature, a 40 wt% perovskite precursor solution was infiltrated by drop casting  
28 via the top of the carbon counter electrode. After drying at 50 °C for 1h, the perovskite  
29 solar cells were obtained.

30 **Assemble of the solar-powered photoelectronchemical device.** The fully solar-

1 powered PEC system was composed of a photoelectrochemical cell using the N/Si co-  
 2 doped TiO<sub>2</sub> NRs as photoanode and Pt sheet as counter electrode, and a PSC as the  
 3 solar-powered source. Under light illumination, the PSC provides the bias potential to  
 4 the N/Si co-doped TiO<sub>2</sub> NRs-based PEC cell for water splitting.

5 The power conversion efficiency ( $\eta$ ) of the perovskite solar cell is calculated  
 6 according to the following formula:

$$7 \quad \eta(\%) = P_{\text{out}}/P_{\text{in}} = (\text{FF} \times J_{\text{sc}} \times V_{\text{oc}})/P_{\text{in}} \quad (\text{S1})$$

8 where  $\eta_{\text{power}}$  presents the photoelectric conversion efficiency,  $P_{\text{in}}$  (100 mW cm<sup>-2</sup> herein)  
 9 and  $P_{\text{out}}$  is the incident light intensity and output power of the solar cell device, FF is  
 10 the fill factor, and  $J_{\text{sc}}$  and  $V_{\text{oc}}$  stand for the short-circuit current density and open-  
 11 circuit voltage of the solar cell device, respectively.

12 The overall solar-to-hydrogen (STH) efficiency of the photoelectrochemical cell is  
 13 calculated with the following equation:

$$14 \quad \text{STH} = \frac{\eta_F \times J_{\text{PEC cell}} \times 1.23V}{P_{\text{in}} \times (S_{\text{TiO}_2} + S_{\text{PSC}})} \times 100\% \quad (\text{S2})$$

15 where  $J_{\text{PEC cell}}$  is the maximum photocurrent given by the photoelectrochemical cell,  
 16  $S_{\text{TiO}_2}$  and  $S_{\text{PSC}}$  is the area of TiO<sub>2</sub> photoanode and PSC respectively,  $\eta_F$  is the Faradic  
 17 efficiency for the H<sub>2</sub> evolution that can be calculated with the following equation:

$$18 \quad \eta_F = \frac{2 \times n_{\text{H}_2} (\text{mol}) \times 96485 (\text{C} \times \text{mol}^{-1})}{Q_c} \times 100\% \quad (\text{S3})$$

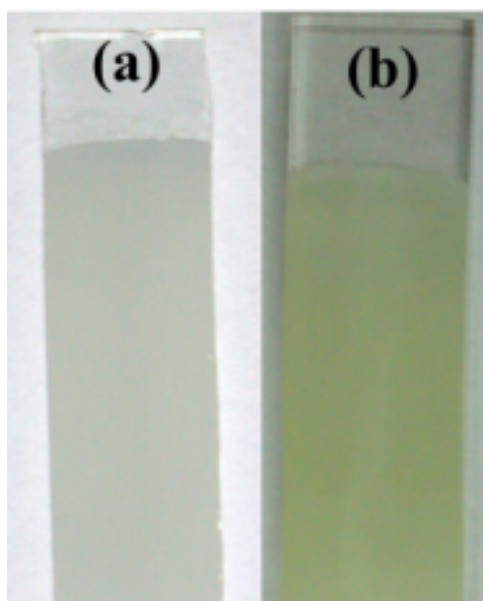

1  
2  
3  
4  
5

**Fig. S1** The optical images of the TiO<sub>2</sub> NRs (a), and (b) the N/Si-codoped TiO<sub>2</sub> NRs deposited on FTO substrate.

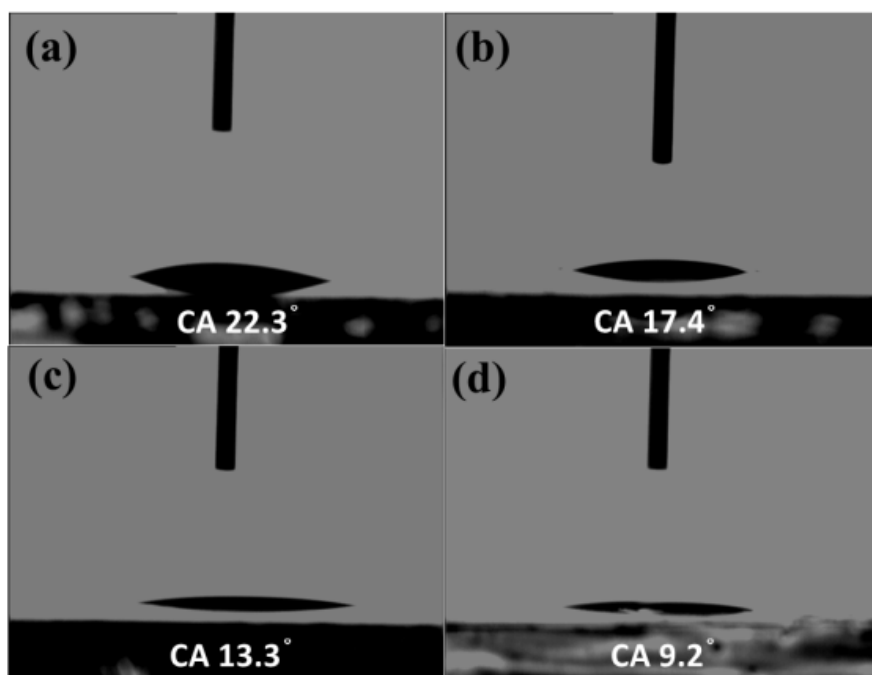

6  
7  
8  
9  
10  
11

**Fig. S2** Photographs showing equilibrium contact angles (CA) of water deposited on the pure TiO<sub>2</sub> NRs (a), the N doped TiO<sub>2</sub> NRs (b), the Si co-doped TiO<sub>2</sub> NRs (c), and (N, Si) co-doped TiO<sub>2</sub> NRs (d), respectively.

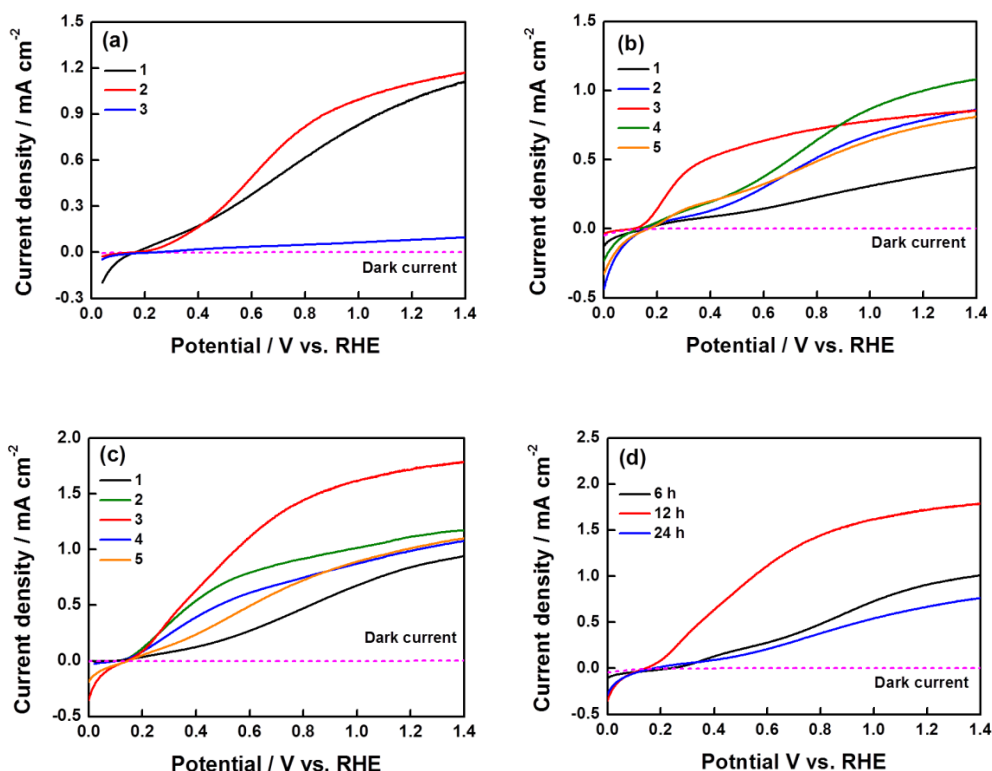

1

2

3

4 **Fig. S3** (a) The LSV plots of N doped TiO<sub>2</sub> NRs prepared with the different content of PI (The Ti/N  
 5 atomic percent ratio was 4.5%, 3.03%, 0.9% for line 1, 2 and 3, respectively). (b) The LSV plots of Si  
 6 doped TiO<sub>2</sub> NRs prepared with different content of TEOS (The Ti/Si atomic percent ratio was 20%,  
 7 10%, 5%, 4% and 2% for line 1, 2, 3, 4 and 5, respectively). (c) The LSV plots of (N, Si) doped TiO<sub>2</sub>  
 8 NRs prepared with different ratio of PI to TEOS (The N/Si atomic percent ratio was 0.2%, 0.4%, 0.8%,  
 9 1.6% and 2% for line 1, 2, 3, 4 and 5, respectively). (d) The LSV plots of (N, Si) co-doped TiO<sub>2</sub> NRs  
 10 prepared with different reaction time under the optimum N/Si atomic percent.

11

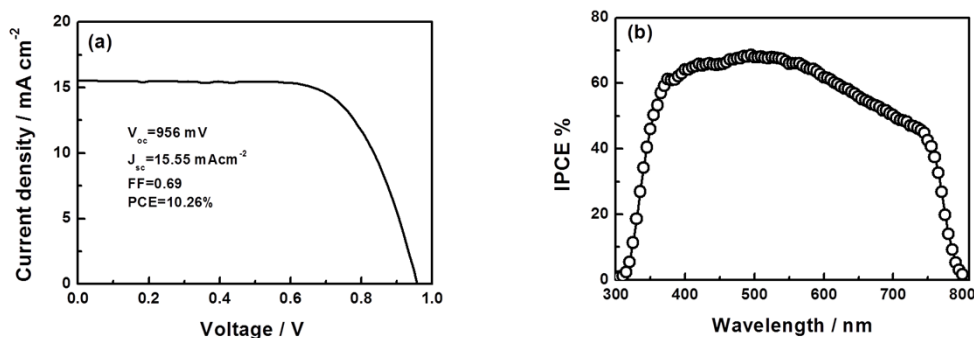

12

13 **Fig. S4** (a) The J-V curve of the perovskite solar cell under simulated AM 1.5G solar irradiation (100  
 14 mW cm<sup>-2</sup>) measured at room temperature. (b) IPCE plot of the perovskite solar cell.

15

16 As shown in Figure S4a, the perovskite solar cell displayed a short-circuit current

1 density ( $J_{sc}$ ) of 15.55 mA cm<sup>-2</sup>, a fill factor (FF) of 0.69, an open-circuit voltage ( $V_{oc}$ )  
 2 of 0.956 V, achieving a PCE of 10.26%. The IPCE reaches a broad maximum at 400  
 3 nm remaining at a level over 50% up to 750 nm as shown in Figure S4b.

4

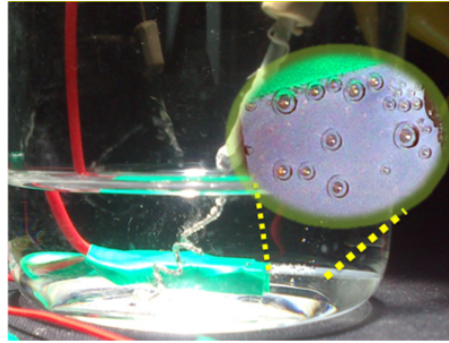

5

6 **Fig. S5** The image of gas evolution on the surface of the electrode.

7

8 The equivalent circuit used for impedance data analysis is shown in Fig. S6.

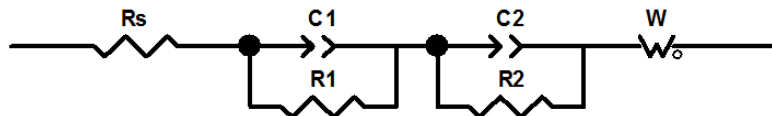

9

10

11 **Fig. S6** The equivalent circuit model used for fitting the experimental data in Figure 3d.

12 **Table S1** The fitting results according to the equivalent circuit model.

| <i>Samples</i>                          | <i>Rs (Ω)</i> | <i>R1 (Ω)</i> | <i>R2 (Ω)</i> |
|-----------------------------------------|---------------|---------------|---------------|
| <b>TiO<sub>2</sub> NRs</b>              | 43.3          | 23            | 2681          |
| <b>N doped TiO<sub>2</sub> NRs</b>      | 45.09         | 57.84         | 1289          |
| <b>Si doped TiO<sub>2</sub> NRs</b>     | 30.03         | 32.45         | 573           |
| <b>N/Si codoped TiO<sub>2</sub> NRs</b> | 27.6          | 4.09          | 191           |

13

14

15

16

17

18

1 Fig. S7 presents the Mott-Schottky (MS) plot as  $1/C^2$  vs. potential at a frequency  
 2 of 1 kHz in the dark. The carrier density ( $N_d$ ) can be calculated according to the Mott-  
 3 Schottky equation (S4),

$$4 \quad \frac{1}{C^2} = \frac{2}{e_0 \epsilon \epsilon_0 N_d} \left[ (E_{app} - E_{fb}) - \frac{k_B T}{e} \right] \quad (S4)$$

5 where  $C$  is the space charge capacitance in the semiconductor;  $N_d$  is the electron  
 6 carrier density;  $e_0$  is the electron charge;  $E_{app}$  is the applied potential;  $\epsilon_0$  is the  
 7 permittivity of the vacuum;  $\epsilon$  is the relative permittivity of the semiconductor;  $E_{fb}$  is  
 8 the flat-band potential;  $T$  is the temperature; and  $k_B$  is the Boltzmann constant.

9 With  $e = -1.6 \times 10^{-19} \text{C}$ ,  $\epsilon_0 = 8.85 \times 10^{-12} \text{ F/m}$ , and  $\epsilon = 110$  for rutile  $\text{TiO}_2$ , the  $N_d$   
 10 values are calculated and summarized in Table S2.

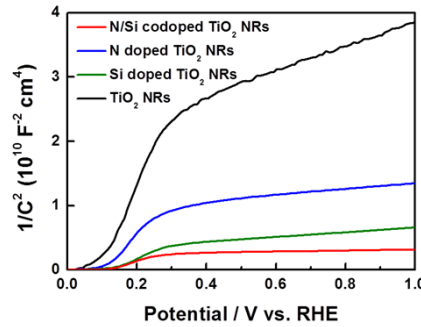

11  
 12 **Fig. S7** The Mott-Schottky plots for the bare, mono-doped and co-doped  $\text{TiO}_2$  NRs photoanodes  
 13 collected at a frequency of 1 kHz in the dark.

14  
 15  
 16 **Table S2** The charge density ( $N_d$ ) values of the bare, mono-doped and co-doped  $\text{TiO}_2$  NRs.  
 17

| Sample                          | $\text{TiO}_2$ NRs | N doped<br>$\text{TiO}_2$ NRs | Si doped $\text{TiO}_2$<br>NRs | N/Si codoped<br>$\text{TiO}_2$ NRs |
|---------------------------------|--------------------|-------------------------------|--------------------------------|------------------------------------|
| $N_d / 10^{19} \text{ cm}^{-3}$ | 0.96               | 2.24                          | 4.61                           | 7.68                               |

18  
 19  
 20  
 21  
 22  
 23  
 24  
 25

1

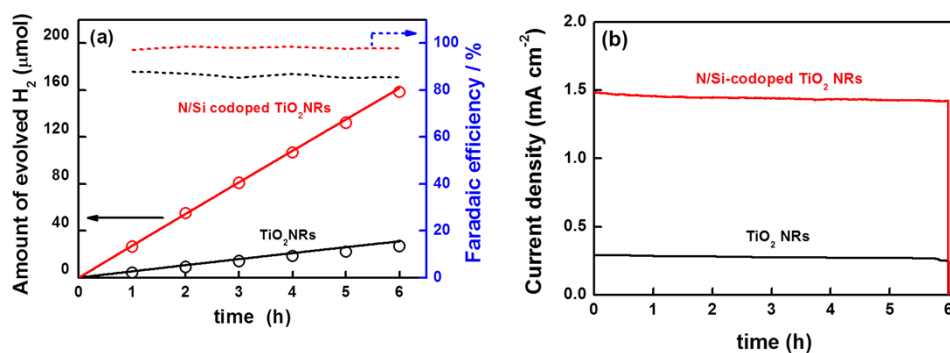

2

3 **Fig. S8** (a) Faradaic efficiency and quantity of detected hydrogen derived from the tandem assembly  
4 cell (PSC+N/Si co-doped TiO<sub>2</sub> NRs and PSC+TiO<sub>2</sub> NRs) under standard one sun AM 1.5 G under  
5 irradiation. Black and red lines correspond to the integration of the net photocurrent divided by 2.  
6 Black and red circles correspond to the H<sub>2</sub> gas measured by gas chromatography during the experiment.  
7 Black and red dash lines correspond to the Faradaic efficiency. (b) The net current measured during the  
8 experiment.
